# Supplementary material for: A tropopause-based a priori for IASI-SOFRID Ozone retrievals: improvements and validation
Source: Copernicus journal article supplement (doi:10.5194/amt-2020-5), 2020-02-28
Supplement: Supplementary file [file amt-2020-5-AC3-supplement.pdf]

## Answers to reviewer #2 :

*1/ My major comment is related to the validation methodology used by the authors; I do have doubts about the fact that ozonesonde data are used both for building a priori (single and variable) and for the validation. It is commonly accepted that one specific dataset or instrument cannot be used both for the a priori used for the retrieval and for the validation of the corresponding retrieved product, for evident reasons. Even if the IASI period validated here (2008-2017) is different from that used to build the a priori (1980-2006 for V3.5 and 2008-2009 for V1.6, hence, the WOUDC measurements used to generate the V1.6 single a priori are included in the validation dataset), I'm wondering to what extent it might affect the results.*

We do not agree with the reviewer about the fact that the use of O3 profiles from the WOUDC ozonesonde dataset for both the a priori and the validation could cause a problem in the validation methodology. Moreover we are not aware of publications which would have highlighted this issue.

We have mostly two objections about the reviewer statement #1:

- First and most importantly, the a priori for an OEM algorithm is not equivalent to a training dataset for an AI (Artificial Intelligence) or a NN (Neural Network) retrieval algorithm or to the ensemble used to constrain a model to provide analyses with a data assimilation system. For an AI or NN algorithm, the retrieved quantities are strongly bounded within the variability of their training datasets and for an assimilation system the analyses will likely provide better comparisons if compared with assimilated data. For an OEM algorithm, the a priori is built from an ensemble of data (mixture of ozone sondes and satellite datasets in our case) to provide the best knowledge of the **average** state and of its **variability**. The ozone sonde profiles from the ensemble are not used individually to train or constrain the algorithm. Therefore we can consider that our a priori data and each sonde profiles are completely independent.

- Second, the O3 sonde instruments are state of the art calibrated and validated in situ instruments. They provide O3 concentrations as close as possible to the « truth ». Each sonde can reasonably be considered as independent from each other. They are very different from remote sensing measurements with limited vertical sensitivity and likely systematic biases. Using observations from a satellite instrument to build an a priori and validate the instrument using this a priori with the same data would raise issues related to the reviewer concerns.

*The a priori contribution contained in the retrieved product would tend to improve the comparison. That a priori contribution can be easily calculated and should be discussed in the validation section. Please discuss that point.*

The a priori is used to complete the information provided by the instrument in the part of the state vector space (O3 profile in our case) where the instrument is not providing information (see Rodgers 2000 for instance). Understandably, this information has to be as accurate as possible. I will rather return the question:

why should we use a single a priori when there are comprehensive and state of the art climatologies available which give better results ?

See reply to next comment which raises the same concern. The quote of Rodgers (2000) (who theorised the OEM for atmospheric soundings) advocates for a climatological latitude and time dependent a priori.

The a priori contribution is theoretically calculated and provided in the paper as the smoothing error based on the retrieval equation (Eq. 1 and Fig. 1 in the manuscript).

Furthermore, the paper gives a rather complete evaluation of the a priori «contribution» on the retrieval comparing retrievals from V1.6 and V3.5. The conclusion is that using a good a priori significantly improves rather than « *tends to improve* » the retrievals based on comprehensive comparisons with 10 years of global ozone soundings.

2/ Section 3.3: *Even if not necessary for a pure validation exercise, the comparison with raw vs smoothed data is interesting as it allows a better evaluation of the O3 variability captured by the instrument. However, one should note that when considering variable a priori (according to season, location and tropopause height), a part of the expected variability is injected by default in the retrieved product through the a priori contribution, making the comparison with raw data wrongly improved when using variable vs single a priori. In addition, the presence of visible stripes (Section 2.4) due to the use of variable a priori that depend on location may constitute an issue for further comparison study, e.g. with CTM. This is exactly why, one can usually prefer using a single vs variable a priori profiles; it gives a homogeneous retrieval at the global scale and the retrieved variability is not distorted by that of the variable a priori. Hence, the true capability of the pair instrument/algorithm to capture the O3 variability is better infer when using a single a priori profile. That point should be clearly discussed in Sections 3.3 and 4.*

Here again we do not agree with the reviewer. A single a priori has long been used in SOFRID for the reasons mentioned by the reviewer and also because it is easier to build and easier to use. These are probably good reasons. Nevertheless, since that time some thorough O3 climatologies based on ozonesonde and satellite data such as Sofieva et al. (2014) have been made available and are used for other sensors (TES/OMI) retrievals as mentioned in the manuscript. They are the «most satisfactory» choice of a priori according to the textbook «inverse methods for atmospheric soundings» of Rodgers (2000). See for instance p166:

« The most satisfactory source of a priori information is from independent high spatial resolution measurements [...] as may be obtained from radiosonde measurements. Such data is often available as climatologies partitioned by, for example, latitude and date».

We fully acknowledge the stripes visible in the global distributions with V3.5. As mentioned in the manuscript they are due to the smoothing error with which they are in good quantitative agreement (< 5DU). If we look at tropospheric O3 in the SH mid-latitudes, we indeed see some marked stripes of about 2.5-5 DU which are of course errors. If we now look at the differences between SOFRID v1.6 and raw sondes we have an average bias of ~ 30% (Fig. 9e) while this difference drops to ~ 0% with V3.5 (fig. 11e). In the first case we have a smooth distribution with large but «invisible» biases and in the second case we have some visible effect of the a priori but low biases. We think that the retrievals are better in the second case. We have chosen to show the striped distributions to clearly document that issue for SOFRID data user.

There is also the improvement concerning the NH seasonal variability which is significant and very satisfactory. We think that these are not «wrong» improvements but just clear and documented ones. SOFRID is not IASI but a comprehensive system based on RTTOV and 1DVar algorithms with IASI radiances, ECMWF auxiliary data and a priori data as input. The validation exercise we have performed gives an evaluation of the whole system. For model comparisons there is no real issue because (i) the problem is already clearly acknowledged in the paper in case of comparisons with raw model data and (ii) as the IASI retrievals are the validating datasets (contrarily to here where they are the validated datasets) the modeled profiles should be smoothed by the retrieval AvKs which will take the issue of the variable a priori into account. To make things clearer, we added the following comment at the end of section 2.4 :

« Such stripes may appear as a problem for the use of SOFRID v3.5 data for model validation. They are a minor problem for two main reasons. First, as is demonstrated in next section, the use of a dynamical a priori largely improves the retrieved O3 profiles. Second, when model profiles are compared to SOFRID retrievals the impact of the a priori profile is taken into account by using Eq. 1 such as in Barret et al. (2016)»

3/ Through Section 4, the authors insist on the fact that “the improvement of SOFRID accuracy . . . is the clearest advantage of using a dynamical a priori profiles”. Given that several sources of improvement are taken into account: dependence on tropopause height, latitude and month, how can the authors be able to dissociate between their respective effects? Please, provide sensitivity tests or clarify that point? Comments 2/ and 3/ highlight the limitations in using variable a priori and evaluating the V3.5 product. The authors should better discuss those issues through the manuscript in order to get a better feeling for the real advantage of using variable a priori (in terms of both location, season and dynamical tropopause).

In our introduction we define « a dynamical a priori profile for spaceborne O3 retrievals which takes the pixel location, time and tropopause height into account » and not only the tropopause. Therefore the statement mentioned by the reviewer about SOFRID improvements is correct and the important point is that the improvements are significant using such a « dynamical » a priori.

The validation has been performed in 30° latitude bands with monthly means. Therefore an important part of the answer is clearly in the paper. Indeed, the large improvement in the seasonal variability in the NH mid (and high) latitudes results from the monthly a priori. As these seasonal variabilities are latitude dependent it also highlights the importance of a latitude dependent a priori. As the tropopause height is largely month- and latitude-dependent it is not possible and it would be artificial to fully « dissociate » the impact of the three parameters on the SOFRID improvements: a climatological a priori is implicitly tropopause dependent. Nevertheless, it is possible to assess the difference between a fully tropopause dependent a priori and a climatological a priori with an implicit tropopause dependence. This has been achieved with a sensitivity test with a single a priori (the one corresponding to the highest occurrence from Sofieva et al. (2014)) for each month and each 10° latitude bands therefore removing the intra-seasonal tropopause variability from the a priori choice.

The results are similar to those of the v3.5 highlighting that the improvement are little dependent on the intra-seasonal variability of the a priori profile. Nevertheless, v3.5 is better concerning the TOC variability in the 30-60°N band which is the most significant region in terms of sonde sampling and in the 60-90°S band. In the UTLS v3.5 is also better in terms of variability and correlation coefficients in most latitude bands.

Therefore, we have changed our manuscript in order to document the fact that the largest part of the improvement is due to the use of a climatological a priori dependent on month and latitude. This is of general interest for other scientists which are working on O3 retrievals and could use simpler climatologies. A new section (4.2 Impact of the intra-seasonal tropopause dependence of the a priori profile on SOFRID improvements) including a figure with a Taylor diagram presenting TOC and UTLS columns (Figure 6) has been added to illustrate this point.

We have also added a sentence in our conclusion:

«A sensitivity test demonstrated that these SOFRID improvements are dominated by the seasonal- and latitude- dependence of the a priori.»

4/ Regarding the comparison with FORLI, the authors are very negative through the manuscript and the critics are most of the time out of context.

We agree and we have improved the manuscript being more positive with FORLI. Nevertheless, we would like to draw the reviewer attention to the fact that our initial statements were based on results published by the FORLI team.

For instance:

- In the abstract: “(iii) in the N.H., no significant temporal drift is detected in SOFRID contrarily to FORLI (~8%)”

This statement is based on Boynard et al. (2018) :

- in the text: «Based on the drift value with the  $2\sigma$  standard deviation and the value (indicated on each plot), the derived **drifts** [...] are **statistically significant** for the TROPO [...] columns ( $-8.6\pm 3.4$  % decade $^{-1}$ ...)».

- in the conclusion : « A **significant negative drift** of  $-8.6 \pm 3.4$  % decade $^{-1}$  is also found in the IASI-A to ozonesonde TROPO O3 column comparison for the Northern Hemisphere. »

Nevertheless, we have used « jump » instead of « drift » in the abstract.

« in the northern hemisphere, the 2010 **jump** detected in FORLI TOCs is not present in SOFRID ».

- *Introduction, L21: “They both document a problem (drift or jump) . . .”*

The full statement is «They both document a problem (drift or jump) in the O3 retrievals around year 2011 but this **does not hinder** the fact that TOC are decreasing according to Wespes et al. (2017). »

This is rather positive acknowledging the possibility to use the data for trends analysis as done in Wespes et al. (2017).

Following the reviewer recommendation about the use of « jump » rather than « drift », we have modified the statement as follows «...They both document a **jump** in the O3 retrievals in 2010 which does not hinder ... »

- *Section 5, p.14, L.7-9: “the SOFRID NH tropospheric drifts discussed in section 4.3 are smaller and opposite in sign to the significant  $-8.6\pm 3.4\%$ /dec drift between FORLI and smoothed sonde data in the NH troposphere presented in B18.”*

*That comparison of the “drift” calculated from SOFRID vs FORLI does not make sense. Indeed, the authors have to make a clear distinction between a “drift” that usually refers to an instrumental drift in validation studies, and a “jump” (or sudden discontinuity) as observed in the FORLI dataset, which induces an artificial drift, in order to avoid any confusion. It has already been clearly explained and discussed in Boynard et al. (2018) and in Wespes et al. (2018; 2019): the drift strongly decreases ( $< 1DU/dec$  on average) after the jump and it becomes even non-significant for most of the stations over the periods before or after the jump, separately. The discontinuity is strongly suspected to result from updates in level-2 temperature data from Eumetsat, which occur at the same date of the detected jump and which are used as inputs into FORLI. Hence, it is obvious that “No significant change occurring around 2010 is detectable for SOFRID v1.6 (Fig. 8(h)) and v3.5 (Fig. 10(h)) NH time series”, given that SOFRID uses L2 from ECMWF, not from EUMETSAT. It should be clarified through the manuscript.*

As mentioned above, we based our comments and our mention of a **drift** on the recent papers concerning FORLI-O3 (Boynard et al., 2016, 2018 and Wespes et al. 2018). The two validation papers present the same 2010 «jump» even though it has not been clearly documented in Boynard et al. (2016). We understand the reviewer argument concerning the difference between a «jump» and a « drift » in FORLI O3 data. Nevertheless, it was not clear in the validation papers of the FORLI team (Boynard et al. , 2016 and 2018) and posterior publications. On the contrary:

- In the statement cited above from *Boynard et al. (2018)*, the words **statistically significant drift** are used.

- In *Wespes et al. (2018)* we read : « Note, however, that a **drift** in the NH middle-low troposphere (MLT) O3 over the whole IASI dataset is reported in Keppens et al. (2018) and Boynard et al. (2018) from comparison with O3 sondes. »

- in *Keppens et al. (2018)*: « Looking at latitude-resolved drift studies for the Ozone\_cci IASI-A nadir ozone profiles (not shown), a **significant decadal negative drift** of the order of 25 % or higher can be observed in the Antarctic UTLS and the northern hemispheric troposphere. »

Concerning the cause of this jump, the reviewer mention «...is obvious that “No significant change [...] given that SOFRID uses L2 from ECMWF, not from EUMETSAT. It should be clarified through the manuscript. »

We do not agree. The reason for the «jump» is not hypothesised as resulting from EUMETSAT L2 discontinuity in Boynard et al. (2018) and Wespes et al. (2018). More specifically :

- in the AMT Discussion of *Boynard et al. (2018)*, Reviewer #2 stated «Unfortunately the **significant drift** in the troposphere is barely explained and addressed». The authors replied « ... a few more years are needed to confirm the observed **negative drifts** and evaluate it on the longer term... », statement which can be found in both the text and the conclusion of the final version of the paper.

- in *Boynard et al. (2018)*, the EUMETSAT L2 discontinuity is mentioned «It is worth mentioning that the EUMETSAT dataset is not homogenous, as it has been processed using different versions of the IASI Level 2 Product Processing Facility between 2008 (v4.2) and 2016 (v6.2)», but it is not clearly mentioned as an explanation for the TROPO-O3 drift/jump.

- in *Wespes et al. (2018)* : « This **drift** ( $\sim 2.8$  DU decade<sup>-1</sup> in the NH) is shown in Boynard et al. (2018) to result from a discontinuity (called “jump” by the author) in September 2010 in the IASI O3 time series, for **reasons that are unclear** at present.»

Therefore, in these publications, no evidence (based on the EUMETSAT L2 products for instance) is given to explain the drift/jump.

It is in the two latest publications, *Keppens et al. (2018)* which is a general paper dealing with nadir ozone products and *Wespes et al. (2019)* dealing with Antarctic stratospheric O3, that the hypothesis of a causal link between EUMETSAT L2 and FORLI-O3 discontinuity is mentioned:

- *Keppens et al. (2018)*: «Part of the **overall negative tropospheric drift** of the FORLI v20151001 IASI retrievals **could, however, be due** to a change in the processing of the IASI L2 processor (e.g. temperature profile) at EUMETSAT that changed to version 5.0.6 in September 2010.»

- *Wespes et al. (2019)*: «The discontinuity is **suspected** to result from updates in level2 temperature data from Eumetsat that are used as inputs into FORLI (see Hurtmans et al., 2012). Hence, the apparent drift reported by Boynard et al. (2018) **likely** results from the jump rather than from a progressive “instrumental” drift.»

In these latest publication the words «**could be**», «**suspected**» and «**likely**» clearly mean that no formal evidence has been found to date.

Based on this review of FORLI literature, we find that the possible explanation of the difference in calculated drifts for both algorithms with the EUMETSAT L2 products was not completely «**obvious**» for us at the time of writing our manuscript.

Nevertheless, we agree with Wespes et al. (2018) that a «jump» occurring in FORLI TROPO-O3 in September 2010 is responsible for most of the 8% «drift».

It is also noteworthy that the authors already discussed (i) the «jumpy» nature of the drift (ii) the role of this jump in the SOFRID FORLI difference concerning the NH tropospheric drift and (iii) even the potential link with EUMETSAT temperature at the end of the SOFRID-FORLI section a couple of lines after the statement cited by reviewer #2:

«These authors attribute their NH tropospheric significant drift to an abrupt change or jump detected in 2010 in FORLI [...] The difference could be linked to the use of EUMETSAT L2

products and of ECMWF analyses for FORLI and SOFRID retrievals respectively. As mentioned previously referring to B18, EUMETSAT L2 product are not homogeneous over the 2008-2016 period and a version change could result in the jump discussed in B18.»

In order to make things clearer we have modified this part taking the reviewer statements into account:

«Nevertheless, the NH tropospheric drift from FORLI is attributed to an abrupt change or jump detected in 2010 (Boynard et al., 2018, Wespes et al. 2018). The drift strongly decreases after the jump and it becomes even non-significant for most of the stations over the periods before or after the jump, separately (Wespes et al. 2018). The discontinuity is suspected to result from updates in level-2 temperature data from EUMETSAT used as inputs into FORLI (Wespes et al., 2019). The absence of jump and the small drift in SOFRID v1.6 and v3.5 NH tropospheric data is therefore probably linked to the use of temperature profiles from ECMWF analyses instead of EUMETSAT L2 products.»

Finally, in the conclusion, we have modified the text to mention a jump rather than a drift in FORLI data:

« The difference with FORLI which is impacted by a significant TOC jump in 2010 (Boynard et al. 2018, Wespes et al. 2018) is likely linked to the use of different temperature profiles for the radiative transfer calculations (ECMWF analyses for SOFRID and EUMETSAT L2 for FORLI). »

*- Section 4.3, p.12, L.6-7: It has also to be clearly noted that Gaudel et al. (2018) study suffers from a lack of consistency between a series of parameters, such as the calculation of the tropopause, making the comparison not quantitative.*

In Gaudel et al. (2018) the tropopause is calculated according to the 2°K lapse rate from WMO for all of the satellite product. The different groups may have used different met-analyses (e.g. NCEP for OMI-MLS, GOME and OMI, ECMWF for SOFRID, IASI-L2 for FORLI) but these resulted in rather little differences in tropopause height that cannot explain the significant differences in trends documented in this publication. In order to evidence the little impact of tropopause calculation in TOC trends and to compare our results with Boynard et al. (2018), we have computed the trends of the difference between sondes and SOFRID for both TOC and Surface-300 hPa columns. While the difference in column values is important (tropopause ~ 250-100 hPa versus 300 hPa), there are no significant changes (less than 0.2%) in the trends of the difference for the whole NH (see Fig 9 and 11 versus Fig. 16).

*- Section 5, p.12, L.32-33: First of all, on the contrary to what is stated in Section 3.4, three indicators (not only two) were calculated in Boynard et al. (2016, 2018), the fourth one (ratio of std) being rarely calculated in validation studies.*

We have corrected in the manuscript.

*That last one that makes possible to draw Taylor diagram is indeed interesting as it allows evaluating the representation of the retrieved variability. It could indeed be investigated for the validation of future FORLI products. Nevertheless, I am surprised that the authors did not perform their own analysis using the FORLI dataset that is publicly available on the french Ether/Aeris platform. It would have prevented possible inconsistencies between the SOFRID and the IASI datasets, the validation methodologies. . .*

As FORLI O3 data have been validated, we did not mean to re-validate them but to take advantage of the corresponding publications to check the consistency between datasets.

For instance, in:

- Section 5, p.13, L9-10: One source of difference between FORLI and SOFRID could be the series of quality flags that have been applied on the datasets to select the best observations in terms of spectral fit and cloudy scenes. Are the flags comparable between the FORLI and the SOFRID datasets? Please comment.

For SOFRID we filter the data with 3 quality flags. The first one described in the retrieval section (section 2) concerns clouds: we exclude cloud scenes based on the AVHRR cloud fraction cover. We now give the threshold which was missing:

« Pixels with AVHRR-derived fractional cloud cover larger than 25% are excluded »

Then we have three more data filters described in the validation section (Section 3): two based on the quality of retrieval (cost function  $J_{cost} > 0.0$  for correct convergence and  $J_{cost} < 1.0$  to eliminate worst fits), one concerning the information content ( $DFS > 2.0$ ).

In order to show that the threshold values are not impacting substantially the SOFRID-FORLI comparisons we have performed sensitivity tests with different values. For  $J_{cost}$  we have used a threshold value of 0.15 instead of 1.0 and the number of selected pixels decreased by 6%. Concerning the cloud filter, we have performed a test with 13% which is the value used in Boynard et al. (2018) instead of 25%. The number of pixels decreased by 5%. For the DFS we have made the comparisons with a threshold of 1.75 instead of 2.00 (which is the threshold used in Boynard et al. (2018)) and the number of pixels increased by 2%.

In each case, the general statistics changes are negligible as can be seen in Figure 1 where the biases and RMSDs for v3.5 with the standard quality flags and with the modified thresholds are presented.

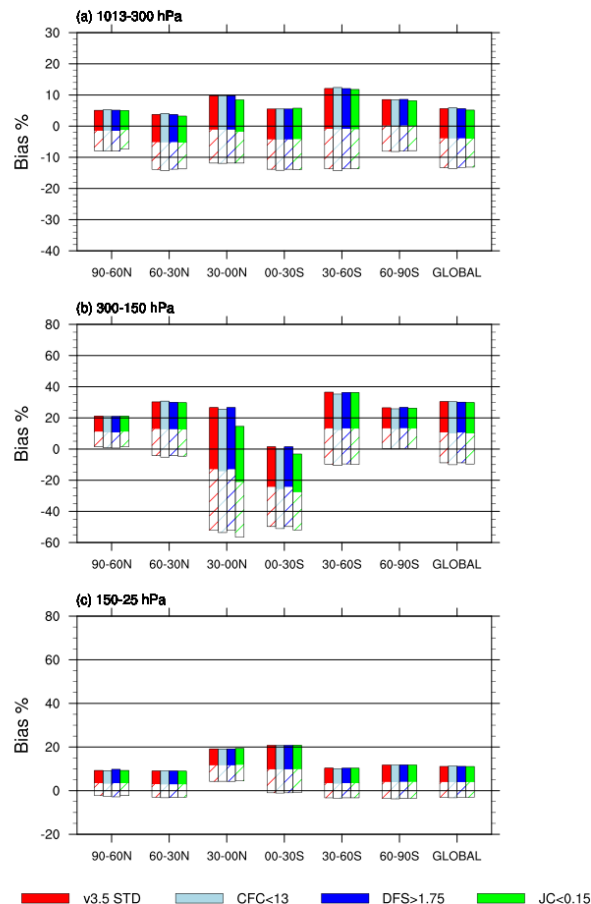

Figure 1 : Biases and RMSDs of the differences between IASI retrievals and sonde data for the standard v3.5 (red), and v3.5 with modified quality flags: AVHRR cloud fraction cover (light blue), DFS (blue) and Jcost (green) (similar to Figure 14 in the paper).

The same is true for the correlation coefficients ( $r^2$ ) and slopes of the linear regressions (b) as shown in Fig. 2.

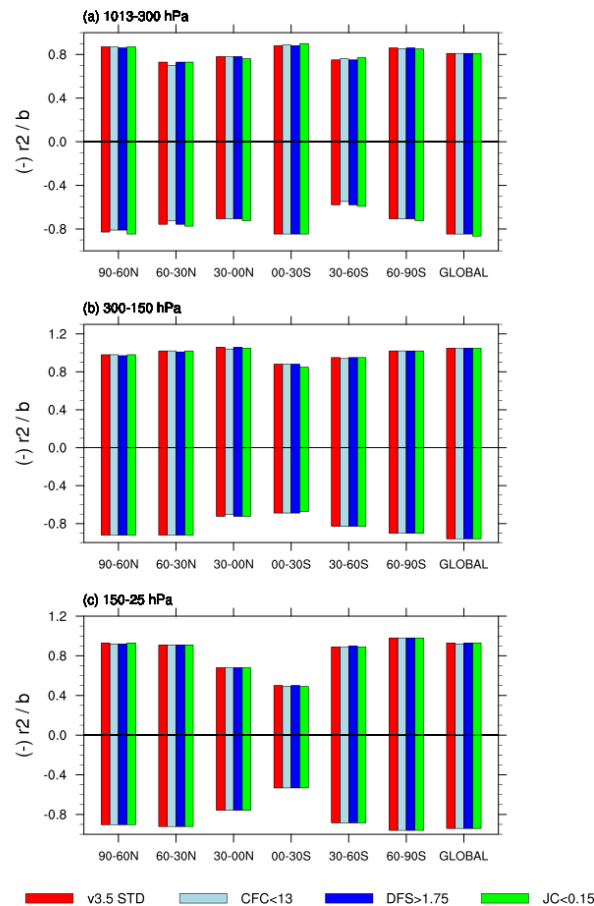

Figure 2. Slopes of the linear regression (positive values) and (-)  $r^2$  correlation coefficients (negative values) between IASI retrievals and sonde data (same as Fig. 13 in the paper).

The comparison of the two IASI-O3 retrievals presented in the paper is therefore robust and not highly dependent on the thresholds used to filter the data.

We have modified the text in the section corresponding to the SOFRID-FORLI comparisons accordingly adding the following text:

«Another limitation is that FORLI and SOFRID use their own quality flags to filter the data. In order to document the impact of the pixel selection on SOFRID validation we have performed the comparison with sonde data using modified quality flags. The cloud filtering threshold is the clearest source of difference between the pixel selection of both algorithms. We have therefore lowered the upper limit of the AVHRR cloud fraction cover to 13% which is the threshold used by Boynard et al. (2016, 2018) resulting in a loss of 5% of the treated pixels. The Jcost threshold has been decreased from 1.0 to 0.15 with a 6% decrease of the selected retrieved profiles. Finally the DFS lower value has been set to 1.75 increasing the number of selected retrievals by 2%. These



threshold modifications resulted in negligible changes of the general statistics (bias, RMSD, R) for the 3 atmospheric layers (troposphere, UTLS and stratosphere) and the different latitude bands that are presented in this section. These statistics, based on large numbers of data are therefore not hindered by pixel selection differences.»

*This is why taking data directly from literature for a quantitative comparison might be inappropriate and mislead the comparison. That issue/limitation in the comparison between SOFRID and FORLI should be clearly highlighted and discussed by the authors. I would strongly recommend the authors to better put the FORLI-SOFRID comparison into context with the reasons mentioned here above (i.e. jump in contrast with real drift, use of different quality flags, possible inconsistency between validation methodology. . .) through the manuscript.*

We agree with the reviewer that the SOFRID-FORLI comparison has important limitations because it is based on published results. Some limitations were already highlighted in the manuscript such as the fact that we could only compare results after smoothing of the sonde data. The jump issue has been largely discussed and amended throughout the manuscript as described above. The issue concerning data filtering is also now largely discussed in the manuscript with evidence given by sensitivity tests on the « quality flags ». Nevertheless, it is important to realize that the quality flag issue is inherent to retrieval algorithm comparisons even with dedicated studies where the data are not taken from the literature.

*- P.6, L.6-7: Why the behavior of TOC errors is similar to that of DFS while one can read above that the dominant source is the smoothing error? Please explain.*

The a priori variability is larger for the TOC in the tropics than at mid and high latitudes because of the higher tropopause height resulting in larger smoothing errors even with higher DFS. We have added the following explanation :

« This is due to the fact that the tropopause height is higher in the tropics resulting in a larger a priori variability. The impact of the increased variability exceeds the one of the increased information content resulting in a larger smoothing error »

*- P.10, L.2-3: Why does the smoothing of sonde profiles not improve the bias in UTLS while the DFS is < 1? Please explain.*

The application of Equ. 1 to the sonde profiles is supposed to correct biases linked to the a priori profiles independently from the DFS value. The fact that (i) the bias is present for v1.6 and v3.5 for which the a priori are different (ii) the application of Equ. 1 does not change significantly the bias, indicate that this particular bias (unlike the TOC biases) is not related to the a priori.

Therefore, this UTLS bias in IASI O3, already identified for the three retrieval algorithms (with and without smoothing) by Dufour et al. (2012) remains an issue.

*- Regarding the figures 12-14, one could think that the authors make their own analysis from the FORLI datasets, while the values are taken from previous validation papers. This should be clearly mentioned in the figure captions to avoid misunderstandings.*

We have added the ref to Boynard et al. (2018) in the captions.

Technical comments and typos:

*- P.2, l.22: The jump is detected in year 2010, not 2011.*

OK

*- P.2, L.30: tropospheric -> tropospheric*

OK

- P.3, L.7: *methodology* -> *methodology*

OK

- P.4, L.33: “*The use OF a . . .*”

OK

- P.5, L.8: *atmospheric* -> *atmospheric*

OK

- P.6, L.1: *Th* -> *The*

OK

- P.7, L.20: *one reference is missing here.*

We have added the ref Havemann (2020) for the convergence criteria of the NWP-SAF 1D-Var algorithm.

- P.7, L.9: *below* -> *above*

balloons with O3 sondes often explode below 40 kms.

- P.7, L.21: *elliminate* -> *eliminate*

OK

- P.8, L.23: *variance* -> *ratio of the variance (?)*

« ... is proportional to the variance of the experiment. Both RMSDs and standard deviations are normalised by the standard deviation of the reference... »

The second sentence implied that, after normalisation « the radial distance from the origin » is proportional to the ratio of the variance of the experiment to the variance of the reference.

We have changed the sentence to be clearer :

« We have normalised both RMSDs and standard deviations by the standard deviation of the reference to display the results from multiple experiments on a single diagram (see Taylor (2001) for details). »

- Table 2: *Units are missing*

We have added the units (%).

- P.9, L.21: *troposphehic* -> *tropospheric*

OK

- P.9, L.27: *UT* -> *UTLS*

OK

- Fig.6 and 7: *The legend is not clear. I guess RS means Raw Sondes and SmRS means Smoothed Sondes. Hence, SmRS should be SmS (?). Please correct or clarify in the caption.*

The caption has been clarified.

- Error in the caption of Fig.9: “*Same as Fig.9*” -> “*Same as Fig.8*”

OK

- Fig.8: *The color legend should be indicated in the top panels.*

The line colors are documented in the captions in order to avoid problems of legend superimposed on the lines.

- P.12, L.6: *Which version of SOFRID are you referring to?*

SOFRID v1.5 was used in Gaudel et al. (2018). We have added the version.

- Fig.12 to 14 do not seem in correct order. Please consider this:

*Fig.14 -> Fig.12, Fig.12 -> Fig.13, Fig.13 -> Fig.14*

We have reordered the citation to the figures in the text.

- P.13, L.1: *delete “(b)” in the sentence. I don’t see that in Fig.13.*

We have modified the caption adding the ref to « b ».
